# Supplementary material
Source: Springer Nature journal article supplement (https://www.springermedizin.de/resource/supplementary/13643_2012_73_MOESM2_ESM.pdf/9681404)
Supplement: MOESM2 [file 9681404]

Search results:  
**328 citations**

Excluded by abstracts: **268 citations**

Full assessment:  
**59 citations**

Excluded by full texts: **53 studies**

Reasons:

- Study was performed in a hospital setting or dose dispensing did not meet the inclusion criteria **n=26**
- Article was not a study report **n=18**
- Study design: case-report or qualitative study **n=4**
- Language was other than English **n=3**
- Duplicate **n=2**

Reference lists:  
**1 study**

Final inclusion:  
**7 studies**
